# Supplementary material for: PRMT inhibition induces a viral mimicry response in triple-negative breast cancer
Source: PubMed Central journal article supplement (PMC9337992; doi:10.1038/s41589-022-01024-4), 2022-05-16
Supplement: 41589_2022_1024_MOESM5_ESM.pdf [file 41589_2022_1024_MOESM5_ESM.pdf]

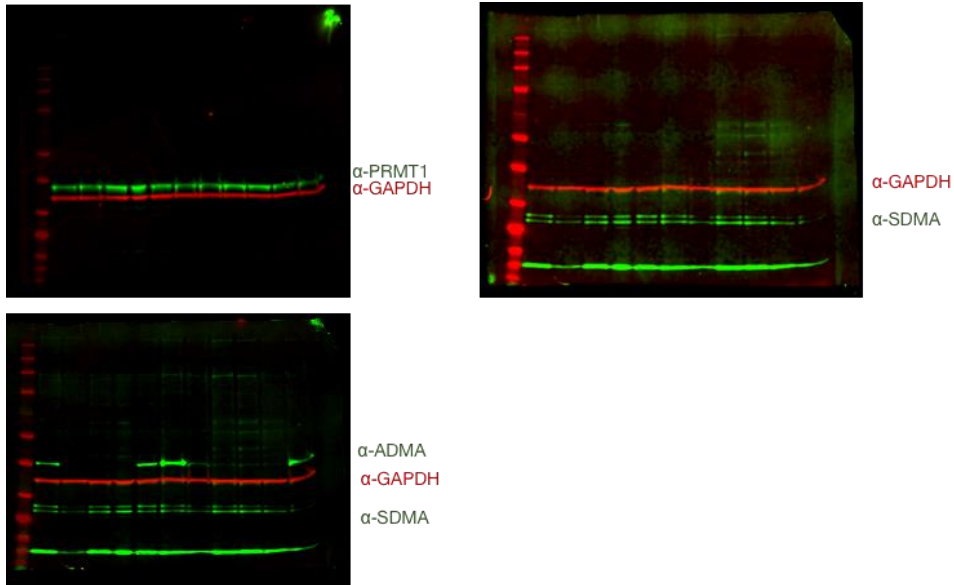

Source images for western blots shown in Fig. 2g.

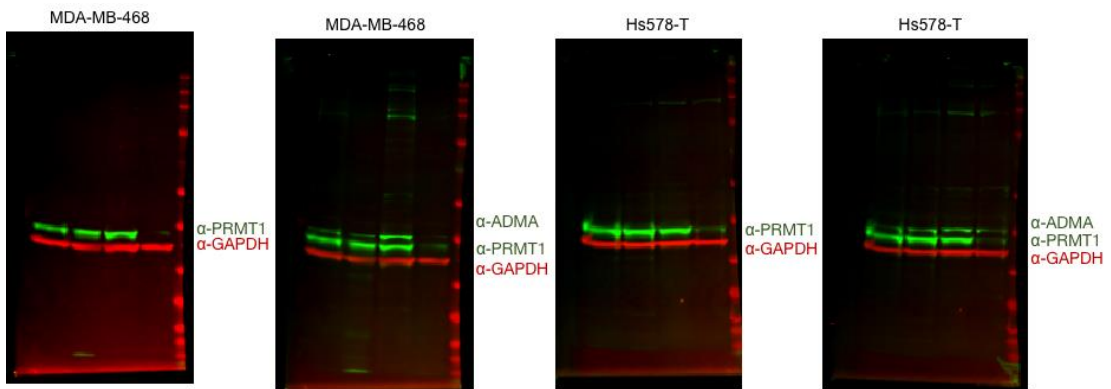

Source images for western blots shown in Fig. 2h.

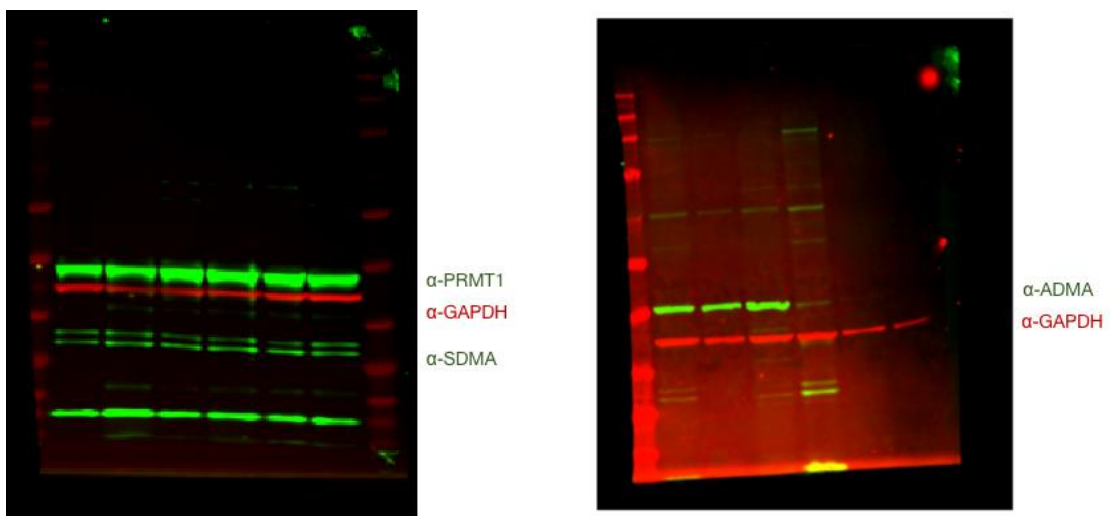

Source images for western blots shown in Fig. 2k.
